# Supplementary material for: Direct growth of 2D nickel hydroxide nanosheets intercalated with polyoxovanadate anions as a binder-free supercapacitor electrode
Source: Royal Society of Chemistry journal article supplement (doi:10.1039/c7nr09626g), 2018-01-01
Supplement: c7nr09626g1.pdf [file c7nr09626g1.pdf]

## Supporting information

### Direct Growth of 2D Nickel Hydroxide Nanosheets Intercalated with Polyoxovanadate Anions as a Binder-Free Supercapacitor Electrode

Jayavant L. Gunjekar,<sup>a,c</sup> Akbar I. Inamdar,<sup>a</sup> Bo Hou,<sup>b</sup> Seung Nam Cha,<sup>b</sup> S. M. Pawar,<sup>a</sup> Abu Talha A. A.,<sup>a</sup> Harish S. Chavan,<sup>a</sup> Jongmin Kim,<sup>a</sup> Sangeun Cho,<sup>a</sup> Seongwoo Lee,<sup>a</sup> Yongcheol Jo,<sup>a</sup> Hyungsang Kim<sup>a</sup> and Hyunsik Im<sup>a\*</sup>

---

<sup>a</sup> Division of Physics and Semiconductor Science, Dongguk University, Seoul 04620, South Korea. E-mail: hyunsik7@dongguk.edu

<sup>b</sup> Department of Engineering Science, University of Oxford, Parks Road, OX1 3PJ, UK

<sup>c</sup> D. Y. Patil Education Society, Kolhapur, India

Electronic Supplementary Information (ESI) available: [EDS–elemental maps, EDS spectrum, Micro-Raman, Capacity retention]. See DOI: 10.1039/x0xx00000x

### S1) Reaction Mechanism for the deposition of LNHV.

The CSD of thin films is a controlled precipitation technique that is based on the principle of solid phase formation during the transformation from a supersaturated state to a saturated state.<sup>1</sup> During the deposition of LNHV thin films, a supersaturated aqueous solution of a hexamine  $\text{Ni}(\text{NH}_3)_4^{+2}$  complex and sodium orthovanadate ( $\text{Na}_3\text{VO}_4$ ) transforms into a saturated state via the gradual evaporation of ammonia ( $\text{NH}_3$ ).

The typical CDS process involves following stepwise reactions

1) The dissolution of  $\text{NiCl}_2$  in water gives the octahedral hexa-aqua nickel (II) complex ion, as follows:<sup>2</sup>

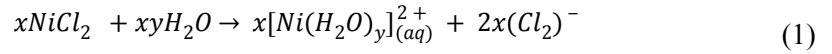

2) The reaction of hexa-aqua nickel (II) complex ion with liquid  $\text{NH}_3$  gives a greenish precipitate of the hydrated  $\text{Ni}(\text{OH})_2$  forms via the hydroxide group-derived *olation* process of the stepwise replacement of the  $\text{H}_2\text{O}$  ligand molecules, as follows:

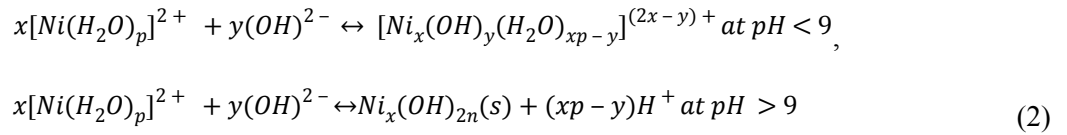

3) Further excess addition of  $\text{NH}_3$  transforms the green precipitate of  $\text{Ni}(\text{OH})_2$  into a clear blue solution of the hexamine nickel complex ( $\text{Ni}(\text{NH}_3)_q^{2+}$ ), where  $q$  is the coordination number, and 6 is the most stable for  $\text{Ni}^{2+}$ .<sup>3,4</sup> The formation of the hexamine nickel complex prevents a spontaneous precipitation, leading to the formation of a supersaturated solution, as follows:

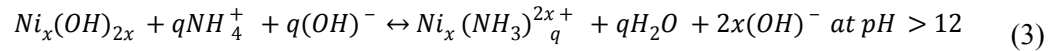

On the other hand hydrolysis of vanadium precursor produces a large variety of POV anions with diverse structures, e.g., chain metavanadates  $[\text{VO}_3^-]_n$ , layered oxides  $[\text{V}_2\text{O}_5]$ , and compact polyanions  $[\text{V}_{10}\text{O}_{28}]^{6-}$ . The structure of these polyoxovanadium ions are solely depends on the concentration and pH.<sup>2,5,6</sup> Pentavalent  $\text{V}^{5+}$  ions induce the  $[\text{V}(\text{OH}_2)_6]^{5+}$  solvated species that are formed in aqueous solution and are surrounded by dipolar  $\text{H}_2\text{O}$  molecules. Considering strong polarizing power and Lewis properties associated with  $\text{V}^{5+}$  and  $\text{H}_2\text{O}$ , respectively, some of the electrons transfer from the  $3a_1$  orbital of the water

molecule to the empty 3d orbitals in the  $V^{5+}$  leading spontaneous acidification and deprotonation of the  $H_2O$  molecules are represented by the following hydrolysis reaction:

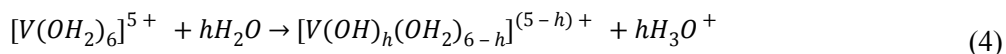

In above reaction the hydrolysis ratio,  $h$ , increases with the pH, leading to the formation of aquo, hydroxo, or oxo species. In the beginning, the pH of the aqueous  $Na_3VO_4$  solution is above 12, and the monomeric, tetrahedral oxo-anionic  $VO_4^{3-}$  species are produced. The structure of polyoxovanadium anions and stability are reported previously.<sup>5,6</sup> A CSD bath for LNHV is made up of the supersaturated hexamminenickel complex solution and subsequent addition of a monomeric orthovanadate ( $VO_4^{3-}$ ). The addition of monomeric orthovanadate ( $VO_4^{3-}$ ) to supersaturated hexamminenickel complex solution leads to a transparent, supersaturated CSD bath with a slight increase in the pH depending on the amount of the  $VO_4^{3-}$  precursor, and the colour changes from transparent blue to dark cyan. The CSD bath is maintained at an elevated temperature ( $\sim 50^\circ C$ ) with the vertically immersed substrates. Consequently, the ionic product exceeds its solubility product via the release of  $H_2O$  and  $NH_3$ . The CSD bath gradually becomes saturated, and precipitation occurs through the heterogeneous growth of  $Ni(OH)_2$  that has been pillared with the POV anions on the substrate and homogeneous growth in the solution phase.

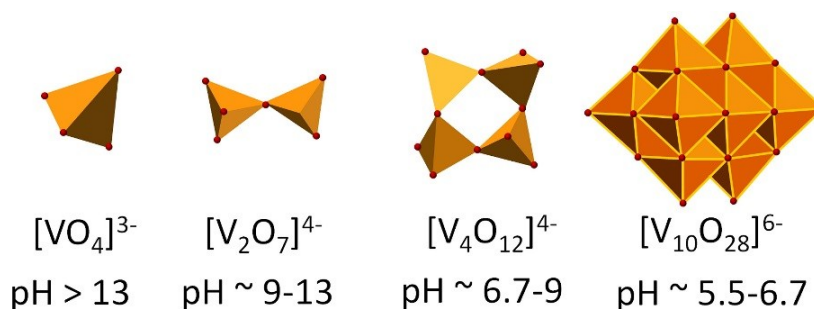

**Fig. S1.** Structural of polyoxovanadate in  $H_2O$  and their stabilization pH range. (Refs. 5,6)

The type of the intercalated species can be predicted by observing the change in the pH. Various possible structural forms of polyoxovanadium present in the solution at the used precursor concentration in CSD are represented in fig. S1, however only  $[V_2O_7]^{4-}$  and  $[V_4O_{12}]^{4-}$  are the polyoxovanadium anions predominant at the hydrolysis reaction pH of CSD. As the precipitation process proceeds, the pH changes

from 12.5 to  $\sim 7$ . As the pH gradually decreases to  $\sim 9$ , condensation occurs due to the continuous deprotonation that leads to the transformation of the  $\text{VO}_4^{3-}$  species into dimeric pyrovanadates  $[\text{V}_2\text{O}_7]^{4-}$ . In the pH range from  $\sim 7$  to 9, a more condensed, cyclic-metavanadate  $[\text{V}_4\text{O}_{12}]^{4-}$  can form.<sup>6</sup> Consequently, the intercalated POV anions are most likely  $[\text{V}_2\text{O}_7]^{4-}$  or  $[\text{V}_4\text{O}_{12}]^{4-}$ .

## S2) BET analysis for LNHV-1 nanohybrids

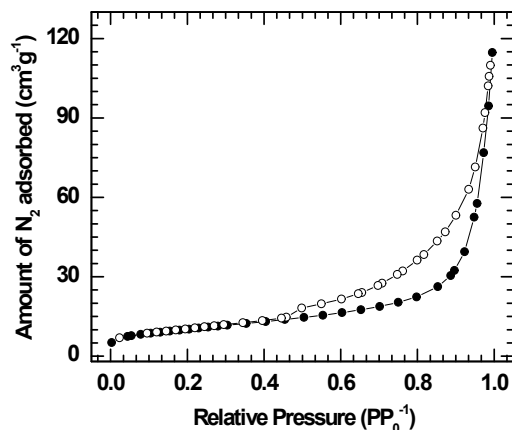

**Fig. S2.**  $N_2$  adsorption-desorption isotherm for LNHV-1 nanohybrids.

The evolution of the pore structure and surface area of the LNHV-1 nanohybrid is examined using  $N_2$  adsorption-desorption isotherm measurements. As shown in Fig. S2, the LNHV-1 nanohybrid exhibits significant  $N_2$  adsorption in the low-pressure region ( $pp_0^{-1} < 0.4$ ) with distinct hysteresis in the high-pressure region ( $pp_0^{-1} > 0.45$ ) representing the incorporation of mesopores in the materials. Based on the IUPAC classification, the present isotherms showing sloping adsorption and desorption branches covering a large range of  $pp_0^{-1}$  with hysteresis behavior are classified as Brunauer-Deming-Deming-Teller (BDDT)-type IV shapes and a H3-type hysteresis loop. The present  $N_2$  adsorption-desorption isotherm behavior is characteristic of a well-ordered mesoporous material with high adsorption energy and slit-shaped pores. The observed adsorption-desorption isotherm behavior is rather similar to the LDH intercalated with polyoxomatalate anions synthesized by the exfoliation-reassembling and ion exchange route. The LNHV-1 nanohybrid demonstrated an expanded surface area of  $36 \text{ m}^2 \text{g}^{-1}$  calculated using the Brunauer-Emmett-Teller (BET) equation. BET analysis highlights the usefulness of the chemical

solution deposition method for the deposition of  $\text{Ni}(\text{OH})_2$ -POV nanohybrids with an expanded surface area.

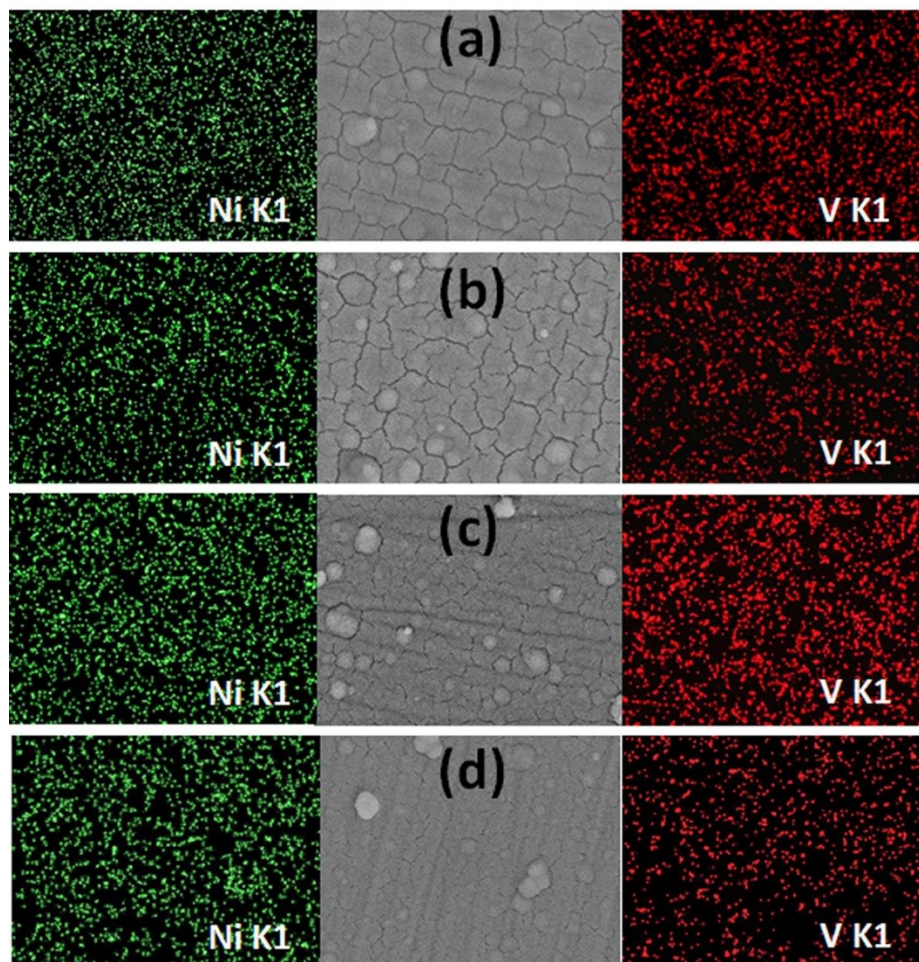

**Fig. S3.** EDS–elemental maps of the (a) LNHV-2, (b) LNHV-1.5, (c) LNHV-1, and (d) LNHV-0.5.

The spatial distributions of component elements in the  $\text{Ni}(\text{OH})_2$ -POV thin films are probed with EDS–elemental mapping analysis. As shown in fig. S3, EDS–elemental maps demonstrating uniform distribution of all component elements, i.e. nickel, vanadium, and oxygen in entire parts of the  $\text{Ni}(\text{OH})_2$ -POV thin films, clearly demonstrating the homogeneous intercalation of polyoxomaterial anions without any phase separation.

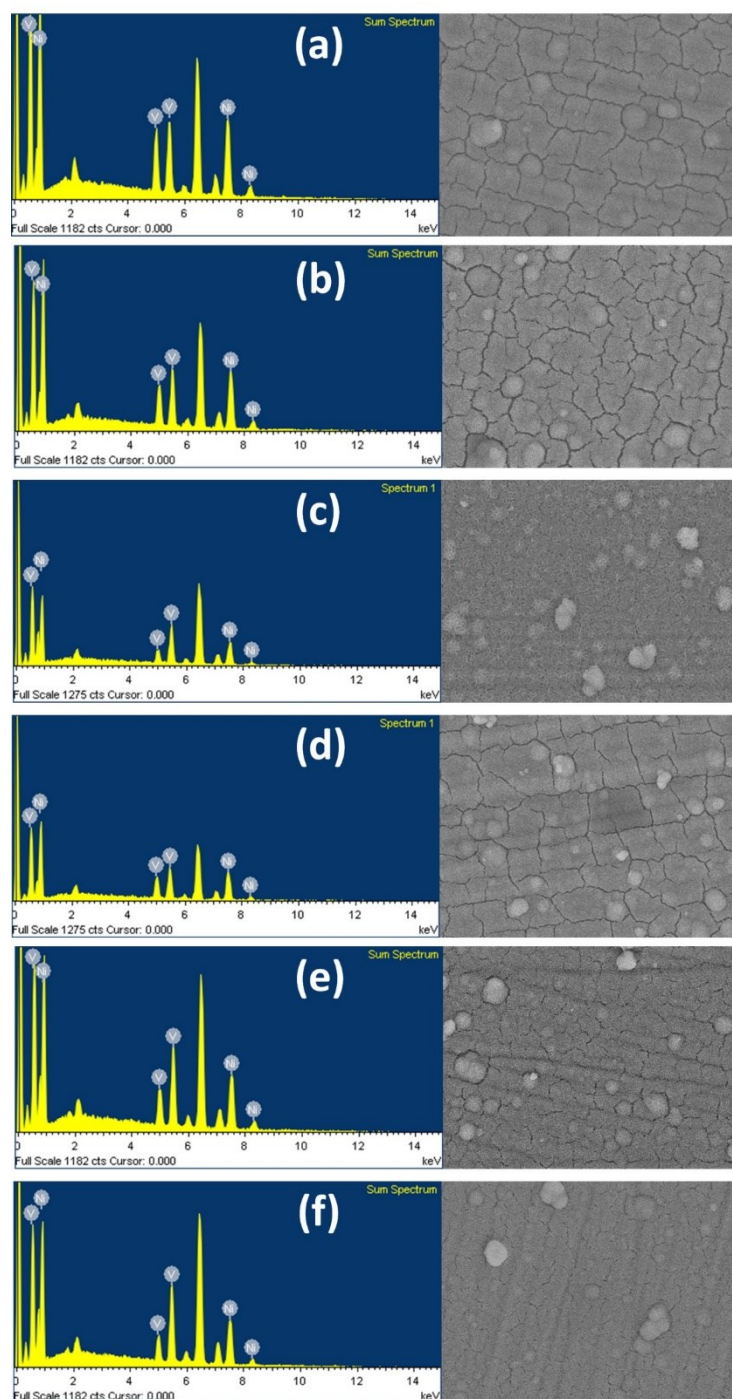

**Fig. S4.** Energy dispersive X-ray spectroscopy EDS spectrum of (a) LNHV-3, (b) LNHV-2.5, (c) LNHV-2, (d) LNHV-1.5, (e) LNHV-1, and (f) LNHV-0.5.

Fig. S4 shows the EDS spectrum of the Ni(OH)<sub>2</sub>-POV thin films deposited at various Ni:V precursor ration. All of the EDS spectra showed the presence of nickel vanadium and oxygen elements in Ni(OH)<sub>2</sub>-POV thin films. The elemental analysis clearly indicating final Ni:V ratio in Ni(OH)<sub>2</sub>-POV thin films is decrease from 4.24 to 3.25 with initial Ni:V ratio. Beyond this point, the final Ni:V ratio appears to be constant with further increase of initial Ni:V ratio. Due to rapid fall of pH for further initial Ni:V reactant ratio, the deposited Ni(OH)<sub>2</sub>-POV thin films become powdery and less adherent beyond the ratio 3 (The ratio of 3 corresponds to a fall of pH from 13 to 7), reflecting uncontrolled precipitation of material in the bulk form. Consequently the vanadium percentage in the Ni(OH)<sub>2</sub>-POV thin films increase at higher initial Ni:V reactant ratio with more condense isopolyoxomatalate. [V<sub>4</sub>O<sub>12</sub>]<sup>4-</sup>. In the low initial Ni:V reactant ratio <0.5, (The ratio of 0.5 corresponds to a fall of pH from 13 to 9) the precipitation of Ni(OH)<sub>2</sub>-POV is too slow, thus leading to the formation of ultrathin Ni(OH)<sub>2</sub>-POV films. Subsequently the vanadium percentage in the Ni(OH)<sub>2</sub>-POV thin films decrease at lower initial Ni:V reactant ratio with less condense isopolyoxomatalate [V<sub>2</sub>O<sub>7</sub>]<sup>4-</sup>. In the intermediate ration of 0.5 to 3 the uniform and adherent Ni(OH)<sub>2</sub>-POV thin films can be obtained with controlled POM content. Based on the chemical elemental analysis, the chemical composition of the Ni(OH)<sub>2</sub>-POV thin films are determined to be Ni(OH)<sub>1.68</sub>·0.08[V<sub>4</sub>O<sub>12</sub>]·yH<sub>2</sub>O, Ni(OH)<sub>1.69</sub>·0.077[V<sub>4</sub>O<sub>12</sub>]·yH<sub>2</sub>O, Ni(OH)<sub>1.71</sub>·0.072[V<sub>4</sub>O<sub>12</sub>]·yH<sub>2</sub>O, {Ni(OH)<sub>1.73</sub>·0.0675[V<sub>4</sub>O<sub>12</sub>]·yH<sub>2</sub>O, Ni(OH)<sub>1.75</sub>·0.0625[V<sub>4</sub>O<sub>12</sub>]·yH<sub>2</sub>O, Ni(OH)<sub>1.77</sub>·0.0575[V<sub>4</sub>O<sub>12</sub>]·yH<sub>2</sub>O} Ni(OH)<sub>0.92</sub>·0.135[V<sub>2</sub>O<sub>7</sub>]·yH<sub>2</sub>O, Ni(OH)<sub>1</sub>·0.125[V<sub>2</sub>O<sub>7</sub>]·yH<sub>2</sub>O, and Ni(OH)<sub>1.08</sub>·0.115[V<sub>2</sub>O<sub>7</sub>]·yH<sub>2</sub>O for LNHV-3, LNHV-2.5, LNHV-2, LNHV-1.5, LNHV-1, and LNHV-0.5, respectively. This result clearly demonstrates the tunability of the chemical composition of the present Ni(OH)<sub>2</sub>-POV thin films.



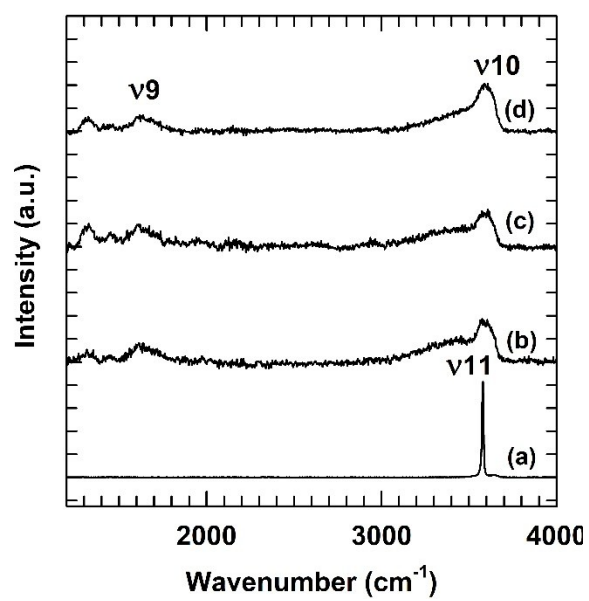

**Fig. S5.** Micro-Raman spectra of (a) LNHV-3,(b) LNHV-1.5, (c) LNHV-0.5, and (d) LNHV-0 thin films deposited on stainless steel.

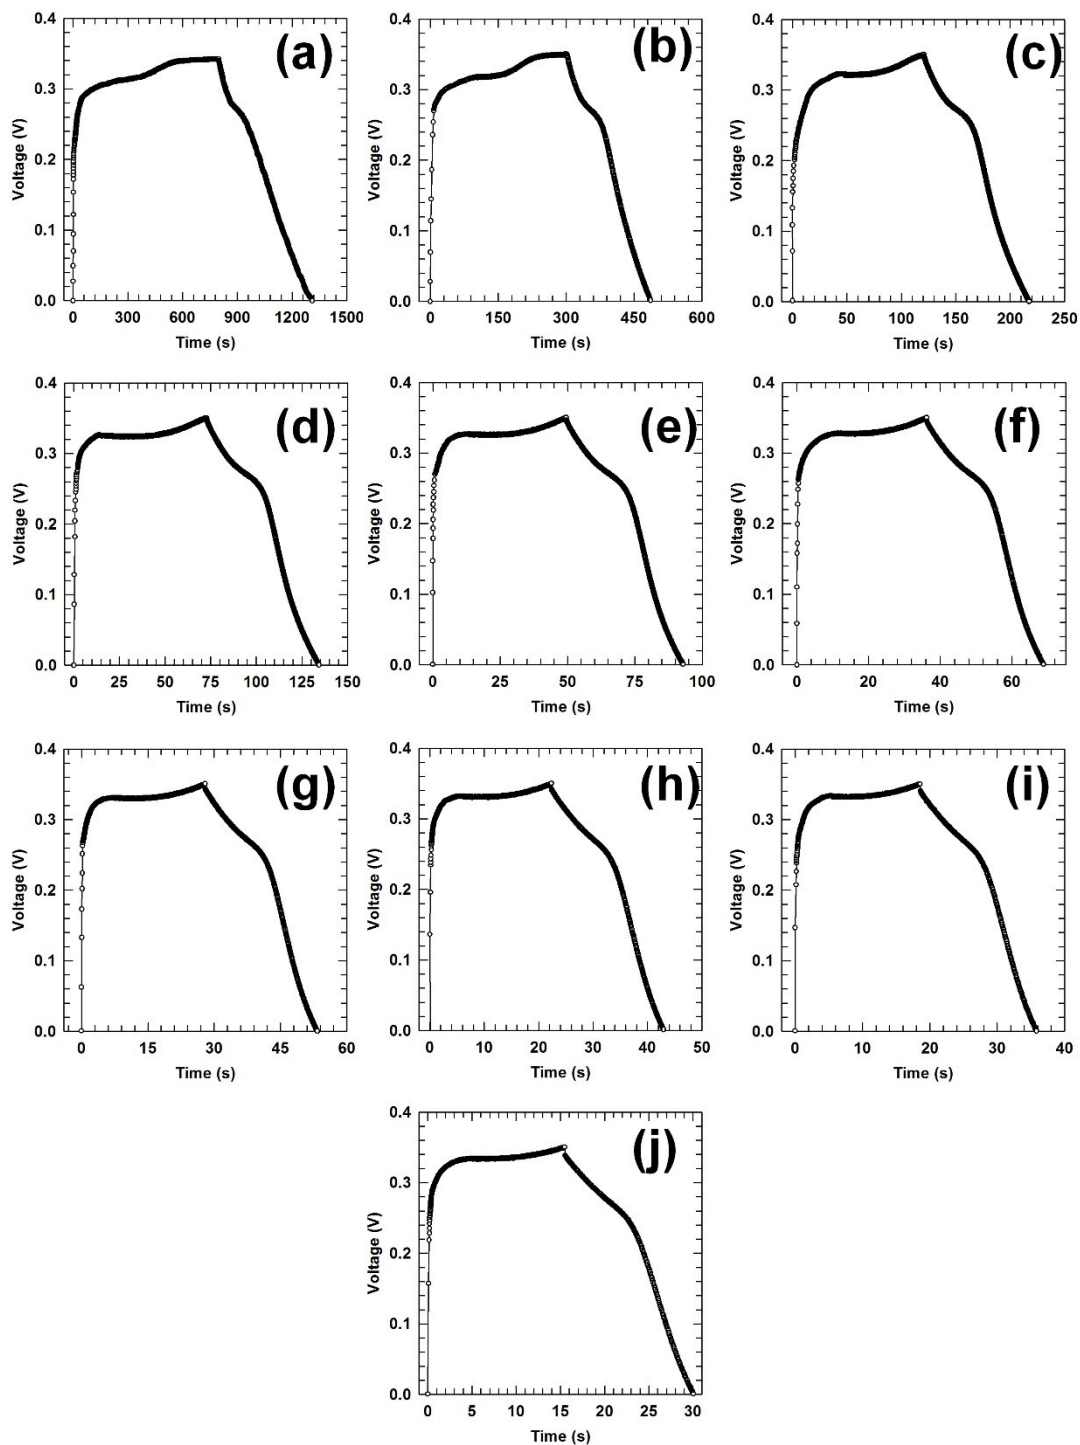

**Fig. S6.** Charge-discharge curves of LNHV-1 nanohybrid at (a) 1, (b) 2, (c) 3, (d) 4, (e) 5, (f) 6, (g) 7, (h) 8, (i) 9 and (j) 10  $\text{Ag}^{-1}$ .

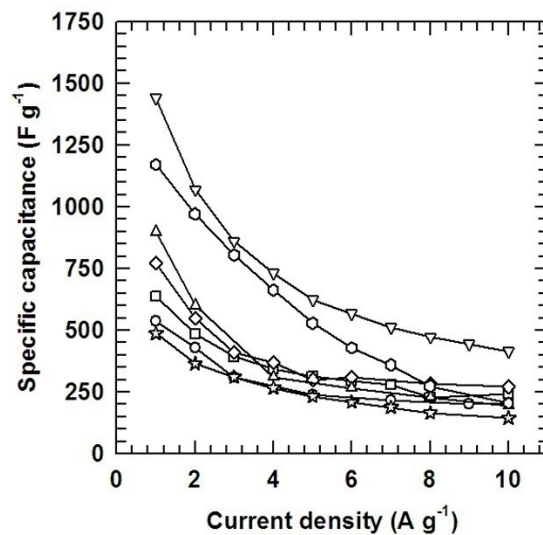

**Fig. S7.** Comparison of the variations of the specific capacitance of Ni(OH)<sub>2</sub>-POV thin films at increasing current density; (circle) LNHV-3, (square) LNHV-2.5, (diamond) LNHV-2, (triangle-up) LNHV-1.5, (triangle-down) LNHV-1, (hex) LNHV-0.5, and (star) LNHV-0.

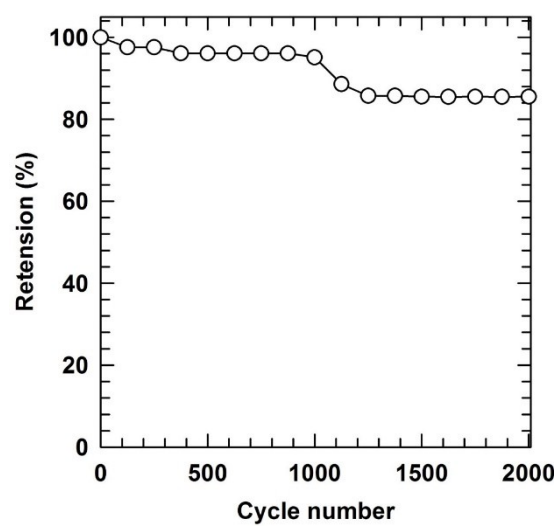

**Fig. S8.** Retention of the specific capacitance of the **LNHV-1** at very high current density of 10  $\text{Ag}^{-1}$ .

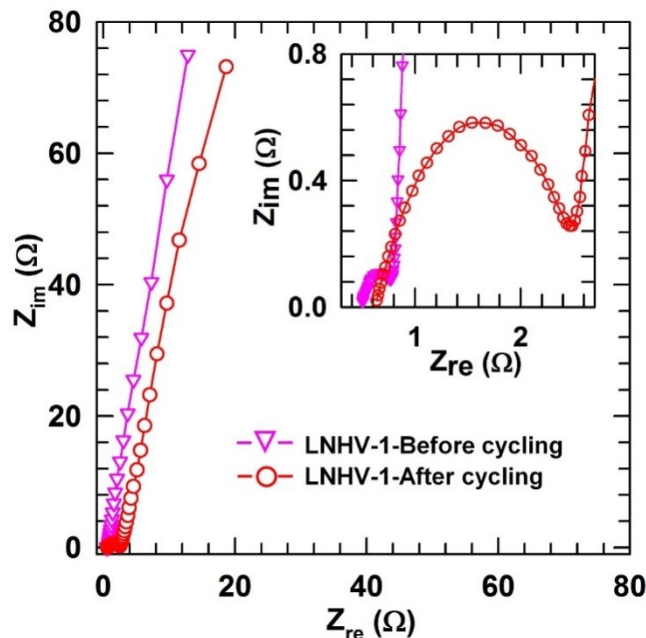

**Fig. S9.** Nyquist plots of the LNHV-1 thin film electrodes. (triangle-down) LNHV-1 before cycling and (circle) LNHV-1 after cycling test. The inset shows an enlarged view of the EIS spectra in the high frequency region.

Figure S9 shows the Nyquist plots for the LNHV-1 thin film electrode before and after cycling test. Both the test shows partially overlapping semicircles in the high frequency region. The presence of a semicircle is linked to the resistance of the electrolyte ( $R_e$ ) and the charge transfer resistance ( $R_{ct}$ ). LNHV-1 thin film electrode demonstrated the similar EIS characteristic before and after cycling with slight increase in starting point and diameter of semicircle. The observed increase is ascribed to the slight dissolution of electrode material and intercalation of electrolyte ions in the layered structure of LNHV-1 nanohybrid. It is observed that even after cycling LNHV-1 electrode demonstrated much smaller semicircle compared with the pristine  $\text{Ni}(\text{OH})_2$  electrode, which indicates the maintenance of improved charge transfer and the electrical conductivity of the LNHV-1 electrode after cycling. Furthermore the inclined lines in the low-frequency region correspond to the Warburg impedance, which is associated with the diffusion of the electrolyte ions into the bulk electrodes. Before and after cycling, LNHV-1 electrode demonstrated similar characteristics with much larger slope as compare to bare  $\text{Ni}(\text{OH})_2$  electrode (LNHV-0), which implies maintenance of lower resistance for the diffusion of the electrolyte ions throughout the electrode after cycling.

**Table S10:** Comparative supercapacitance performance of Ni(OH)<sub>2</sub> and its intercalative composite.

|    | <b>Materials</b>                                                                                                         | <b>Electrode Composition /Electrolyte/Current collector</b>                                                                   | <b>Maximum Specific Capacitance (F g<sup>-1</sup>)</b> | <b>Stability retention (Cyclic number)</b> | <b>Ref.</b>  |
|----|--------------------------------------------------------------------------------------------------------------------------|-------------------------------------------------------------------------------------------------------------------------------|--------------------------------------------------------|--------------------------------------------|--------------|
| 1  | Honeycomb-like $\beta$ -Ni(OH) <sub>2</sub> thin films                                                                   | $\beta$ -Ni(OH) <sub>2</sub> thin films/2 M KOH/ stainless steel                                                              | 398<br>(CV scan rate 5 mVs <sup>-1</sup> )             |                                            | 7            |
| 2  | $\alpha$ -Ni(OH) <sub>2</sub> nanosheet based hierarchical microspheres (NBHMs) intercalated with Cl <sup>-</sup> anions | NBHMs+vapor-grown carbon fiber as a conducting material + poly (vinylidene fluoride) (PVDF)/ 1 M KOH/ Ni-foam                 | 1494<br>(1 Ag <sup>-1</sup> )                          | 500                                        | 8            |
| 3  | $\beta$ -Ni(OH) <sub>2</sub> thin films                                                                                  | $\beta$ -Ni(OH) <sub>2</sub> thin films/ 2M KOH/ stainless steel                                                              | 468<br>(0.5 mAcm <sup>-1</sup> )                       | 1000                                       | 9            |
| 4  | $\beta$ -Ni(OH) <sub>2</sub> thin films by SILAR method                                                                  | $\beta$ -Ni(OH) <sub>2</sub> thin films/ 2M KOH/ stainless steel                                                              | 350<br>(CV scan rate 20 mVs <sup>-1</sup> )            |                                            | 10           |
| 5  | $\beta$ -Ni(OH) <sub>2</sub> /γ-NiOOH composite film                                                                     | $\beta$ -Ni(OH) <sub>2</sub> /γ-NiOOH composite film/ 1 M KOH/ Ni-foam                                                        | 1420<br>(2 Ag <sup>-1</sup> )                          | 1000                                       | 11           |
| 6  | $\beta$ -Ni(OH) <sub>2</sub> nanoparticles                                                                               | $\beta$ -Ni(OH) <sub>2</sub> nanoparticles/1 M KOH/ stainless steel                                                           | 715.3<br>(0.5 Ag <sup>-1</sup> )                       |                                            | 12           |
| 7  | Ni(OH) <sub>2</sub> mixed phase                                                                                          | Ni(OH) <sub>2</sub> mixed phase+20 wt% carbon black + 5 wt% polytetrafluoroethylene (PTFE)/ 1 M KOH/ Ni-foam                  | 755<br>(1 Ag <sup>-1</sup> )                           | 500                                        | 13           |
| 8  | Ni foam decorated Ni(OH) <sub>2</sub> nanoflakes array                                                                   | Ni foam decorated Ni(OH) <sub>2</sub> nanoflakes array/ 3 M KOH/ Ni-foam                                                      | 1228<br>(5 Ag <sup>-1</sup> )                          | 1000                                       | 14           |
| 9  | Ni(OH) <sub>2</sub> glucose assisted solvothermal synthesis.                                                             | Ni(OH) <sub>2</sub> + conductive graphite +polyvinylidene difluoride (PVDF)/ 2 M KOH/ Ni-foam                                 | 1055<br>(1 Ag <sup>-1</sup> )                          | 1000                                       | 15           |
| 10 | Interstratified hybrids of α-hydroxides of nickel and cobalt                                                             | α-hydroxide of Ni and Co+graphite+binder PTFE/ 2 M KOH/ Ni-foam                                                               | 990<br>(1 Ag <sup>-1</sup> )                           | 600                                        | 16           |
| 11 | MnO <sub>2</sub> -pillared NiFe-LDH                                                                                      | MnO <sub>2</sub> -pillared NiFe-LDH+ acetylene black + polyvinylidene fluoride/ 1 M Na <sub>2</sub> SO <sub>4</sub> / Ni-mesh | 190<br>(CV scan rate 5 mVs <sup>-1</sup> )             |                                            | 17           |
| 12 | Ni(OH) <sub>2</sub> intercalated with polyoxovanadate anions (Ni(OH) <sub>2</sub> -POV)                                  | Ni(OH) <sub>2</sub> -POV thin films/ 2 M KOH/ stainless steel                                                                 | 1440<br>(1 Ag <sup>-1</sup> )                          | 2000                                       | Present work |

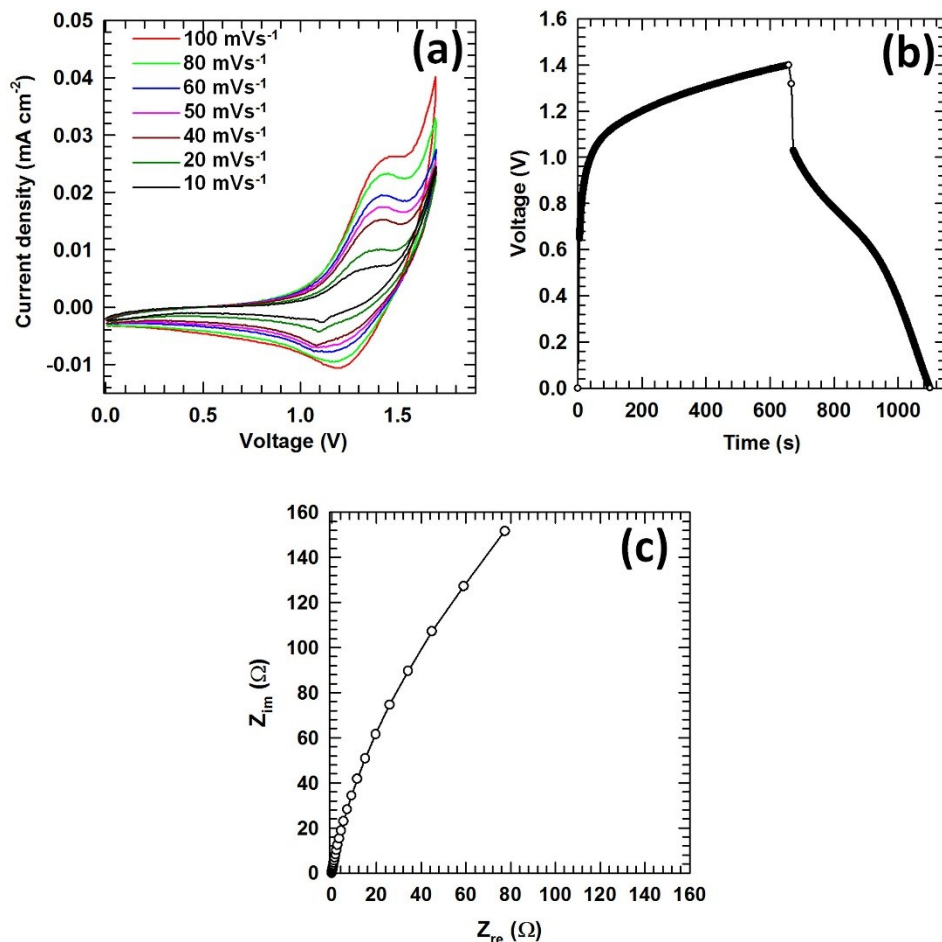

**Fig. S11.** (a) CV curves of the symmetric Ni(OH)<sub>2</sub>-POV (LHNV-1) thin film supercapacitor at various scan rates. (b) GCD curve of the symmetric Ni(OH)<sub>2</sub>-POV (LHNV-1) thin film supercapacitor at 1 Ag<sup>-1</sup>. (c) Nyquist plot of the symmetric Ni(OH)<sub>2</sub>-POV (LHNV-1) thin film supercapacitor.

We tested supercapacitance performance of the LNHV-1 nanohybrids for the two electrode configuration. The LNHV-1 nanohybrid electrodes are used as a positive and negative electrode for symmetric device configuration. The LNHV-1 nanohybrids demonstrated promising supercapacitive activity with a wide operating potential window of 0 to 1.7 V and specific capacitance of 285.7 Fg<sup>-1</sup>.

## References

1. G. Hodes, *Chemical solution deposition of semiconductor films*. Marcel Dekker, New York, 2003; p. 2.
2. C. F. Baes and R. E. Mesmer, In *The hydrolysis of cations*. Wiley, New York, 1976; p. 241.
3. Y. G., Li, B. Tan and Y. Wu, *Chem. Mater.* 2008, **20**, 567-576.
4. I. Ichinose, K. Kurashima, and T. Kunitake, *J. Am. Chem. Soc.* 2004, **126**, 7162-7163.
5. J. Livage, *Coordin. Chem. Rev.* 1998, **178**, 999-1018.
6. Y. Hayashi, *Coordin. Chem. Rev.* 2011, **255**, 2270-2280.
7. U. M. Patil, K. V. Gurav, V. J. Fulari, C. D. Lokhande, and O. S. Joo, *J. Power Sources* 2009, 188, 338–342.
8. J. W. Lee, J. M. Ko, and J. D. Kim, *J. Phys. Chem. C* 2011, 115, 19445–19454.
9. D. P. Dubal, V. J. Fulari, and C. D. Lokhande, *Micropor. Mesopor. Mater.* 2012, 151, 511–516.
10. S. B. Kulkarni, V. S. Jamadade, D. S. Dhawale, and C. D. Lokhande. *Appl. Surf. Sci.* 2009, 255, 8390–8394.
11. Y. F. Yuan, X. H. Xia, J. B. Wu, J. L. Yang, Y. B. Chen, and S. Y. Guo, *Electrochim. Acta* 2011, 56, 2627–2632.
12. M. Aghazadeh, A. N. Golikand, and M. Ghaemi, *Int J Hydrogen Energy* 2011, 36, 8674-8679.
13. P. Lu, F. Liua, D. Xue, H. Yang, and Y. Liu, *Electrochim. Acta* 2012, 78, 1-10.



14. B. Hu, X. Qin, A. M. Asiri, K. A. Alamry, A. O. Al-Youbi, and X. Sun, *Electrochim. Acta* 2013, 107, 339– 342.
15. G. Lee, C. V. Varanasi, and J. Liu, *Nanoscale*, 2015, 7, 3181–3188.
16. M. Sebastian, C. Nethravathi, and M. Rajamathi, *Mater. Res. Bul.* 2013, 48, 2715–2719.
17. H. Li, G. Zhu, Z. Yang, Z. Wang, and Z. Liu, *J. Colloid Interface Sci.* 2010, 345, 228–233.
